# Supplementary material for: Ion and water transport reasonably involves rotation and pseudorotation: measurement and modeling the temperature dependence of small-angle neutron scattering from aqueous SrI2
Source: Royal Society of Chemistry journal article supplement (doi:10.1039/d0cp02088e), 2020-01-01
Supplement: d0cp02088e1.pdf [file d0cp02088e1.pdf]

*Supplementary results*

The origins of these calculated values are explained in Section II.4.

Table S1. Calculated vibrational magnitudes of gas phase D<sub>2</sub>O and H<sub>2</sub>O.

**H<sub>2</sub>O**

| Mode                        | Frequency/cm <sup>-1</sup> | v <sup>a</sup> | Range <sup>b</sup> O-H <sub>1</sub> /Å | Range <sup>b</sup> O-H <sub>2</sub> /Å | Range <sup>b</sup> H <sub>1</sub> -H <sub>2</sub> /Å |
|-----------------------------|----------------------------|----------------|----------------------------------------|----------------------------------------|------------------------------------------------------|
| v <sub>2</sub> (bend)       | 1595                       | 0              | 0.014                                  | 0.014                                  | 0.235                                                |
|                             |                            | 1              | 0.024                                  | 0.024                                  | 0.407                                                |
| v <sub>1</sub> (sym. str.)  | 3657                       | 0              | 0.135                                  | 0.135                                  | 0.215                                                |
|                             |                            | 1              | 0.234                                  | 0.233                                  | 0.372                                                |
| v <sub>3</sub> (asym. str.) | 3756                       | 0              | 0.135                                  | 0.135                                  | 0.000                                                |
|                             |                            | 1              | 0.234                                  | 0.234                                  | 0.000                                                |

**D<sub>2</sub>O**

| Mode                        | Frequency/cm <sup>-1</sup> | v <sup>a</sup> | Range <sup>b</sup> O-H <sub>1</sub> /Å | Range <sup>b</sup> O-H <sub>2</sub> /Å | Range <sup>b</sup> H <sub>1</sub> -H <sub>2</sub> /Å |
|-----------------------------|----------------------------|----------------|----------------------------------------|----------------------------------------|------------------------------------------------------|
| v <sub>2</sub> (bend)       | 1178                       | 0              | 0.010                                  | 0.010                                  | 0.204                                                |
|                             |                            | 1              | 0.017                                  | 0.017                                  | 0.354                                                |
| v <sub>1</sub> (sym. str.)  | 2671                       | 0              | 0.115                                  | 0.115                                  | 0.174                                                |
|                             |                            | 1              | 0.199                                  | 0.199                                  | 0.301                                                |
| v <sub>3</sub> (asym. str.) | 2788                       | 0              | 0.116                                  | 0.116                                  | 0.000                                                |
|                             |                            | 1              | 0.201                                  | 0.201                                  | 0.000                                                |

a. v = vibrational quantum number (0 = ground state, 1 = excited state)

b. Range X-H = difference between X-H distances at inner and outer turning points (Å)
